# Supplementary material for: Loops, topologically associating domains, compartments, and territories are elastic and robust to dramatic nuclear volume swelling
Source: PubMed Central journal article supplement (PMC8933507; doi:10.1038/s41598-022-08602-5), 2022-03-18
Supplement: 41598_2022_8602_MOESM1_ESM.pdf [file 41598_2022_8602_MOESM1_ESM.pdf]

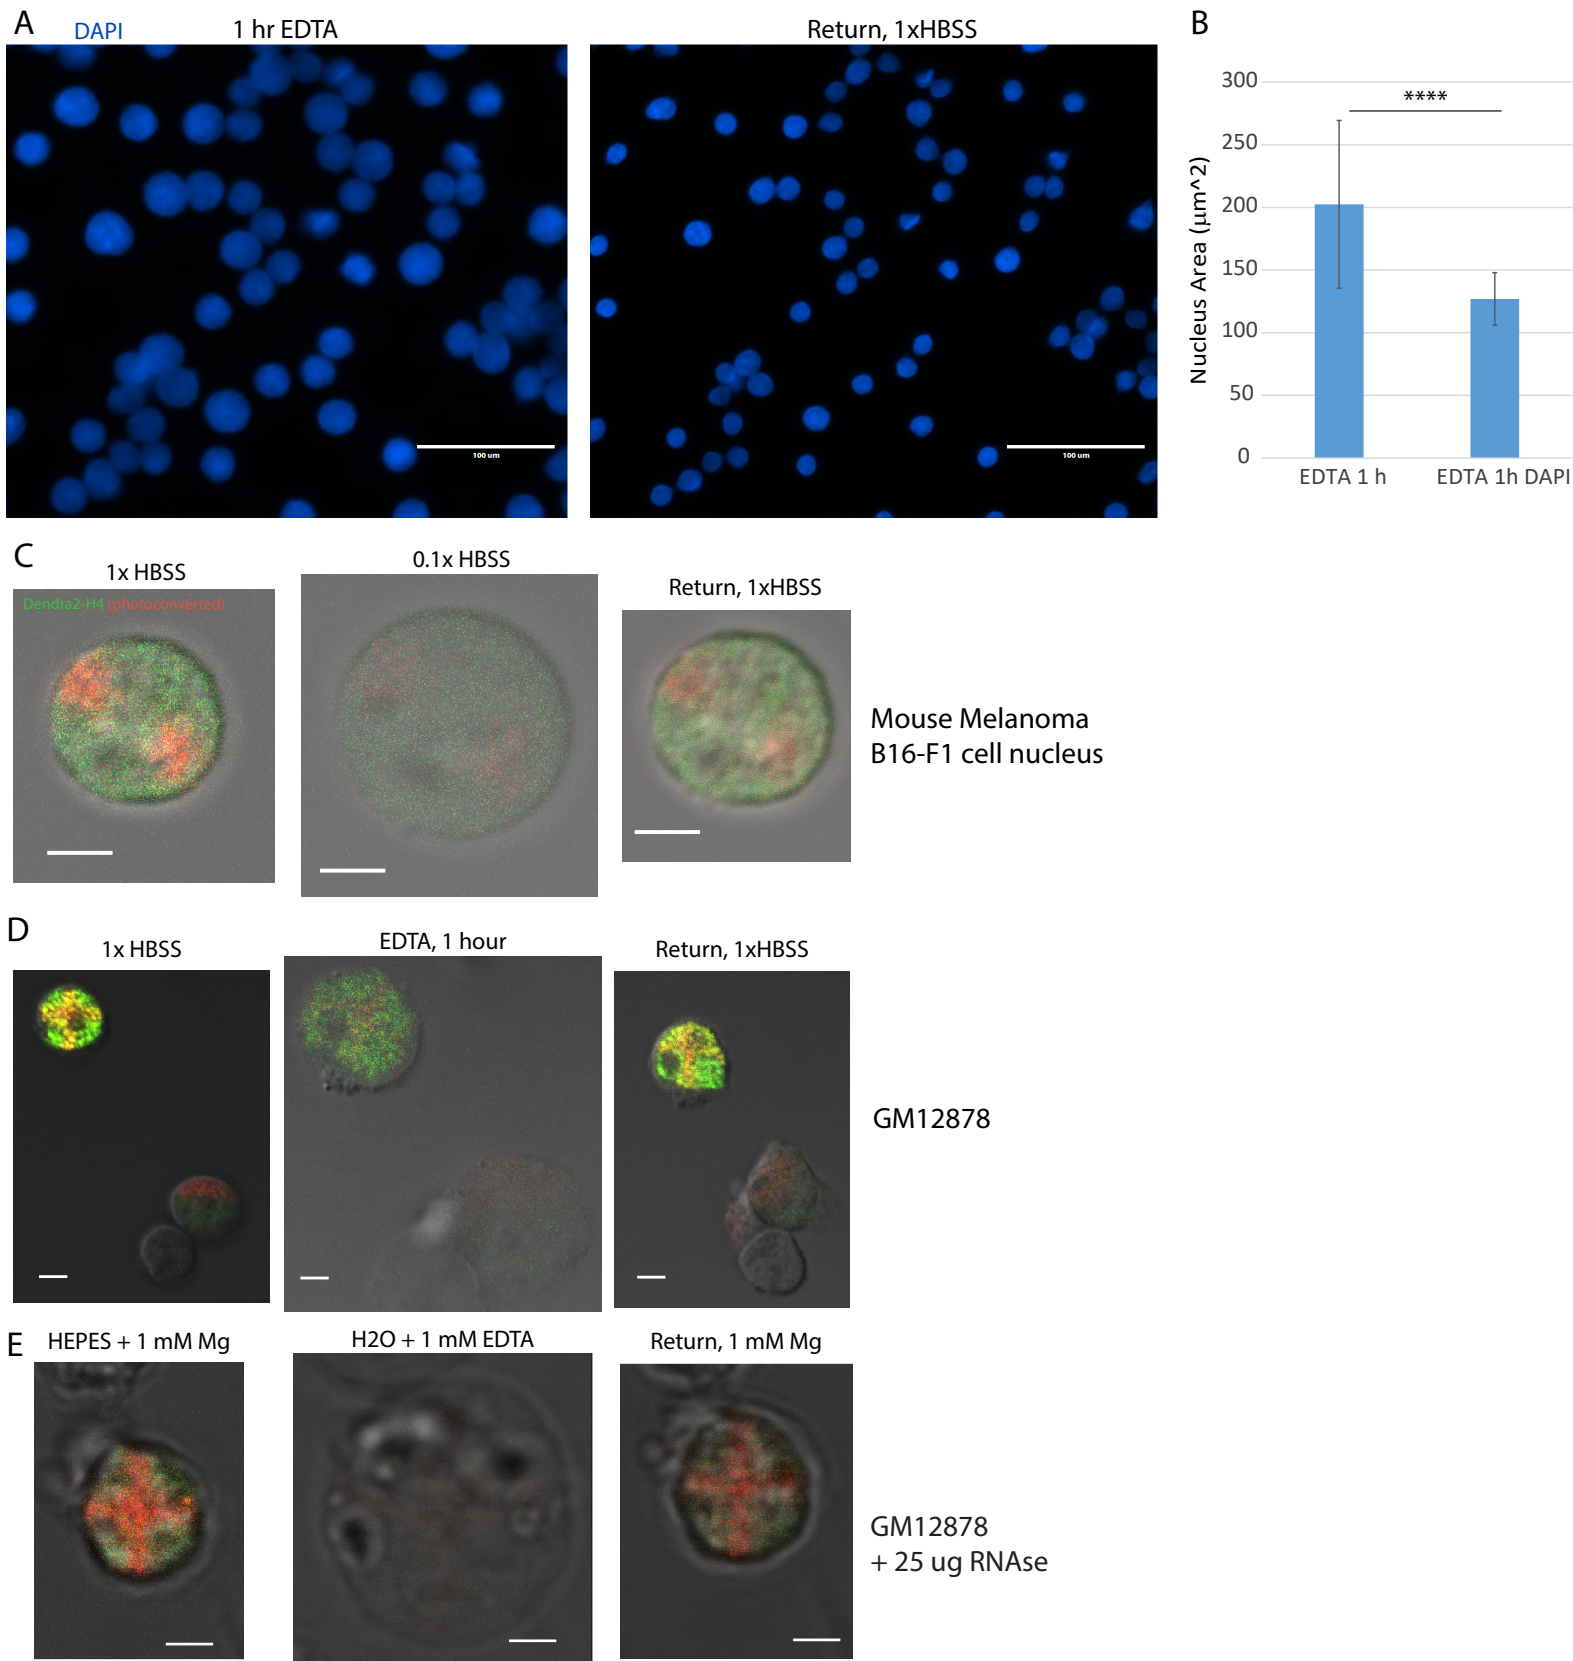

Supplementary Figure 1. A) DAPI staining after 1 h incubation of GM12878 nuclei in HEPES + 1 mM EDTA (left) and return to 1x HBSS (right) shows chromatin fills expanded nucleus space (scale = 100  $\mu\text{m}$ ). B) The addition of DAPI after expansion reduces the size of the nuclei (EDTA 1h  $N = 115$ ; DAPI  $N = 28$ ; error bars = std. dev., \*\*\*\*  $p < 10^{-10}$ , unpaired two-tailed t-test). C) Photoconverted pattern is also preserved upon a different approach to low salt expansion (dilution to 0.1x HBSS) and in a different cell type (mouse melanoma; scale = 3  $\mu\text{m}$ ). D) Photoconverted pattern in GM12878 cell is preserved after 1 hour of expansion, though the nucleus rotated  $\sim 90$  degrees around the coverslip attachment point (see altered nucleolus position). (scale = 3  $\mu\text{m}$ ) E) RNase treatment does not affect nucleus expansion or fidelity of chromatin positioning after expansion. Nuclei were treated with 25  $\mu\text{g}$  of RNase (in 200  $\mu\text{L}$ ) for 10 min and then subjected to expansion. Scale bar = 2  $\mu\text{m}$ .

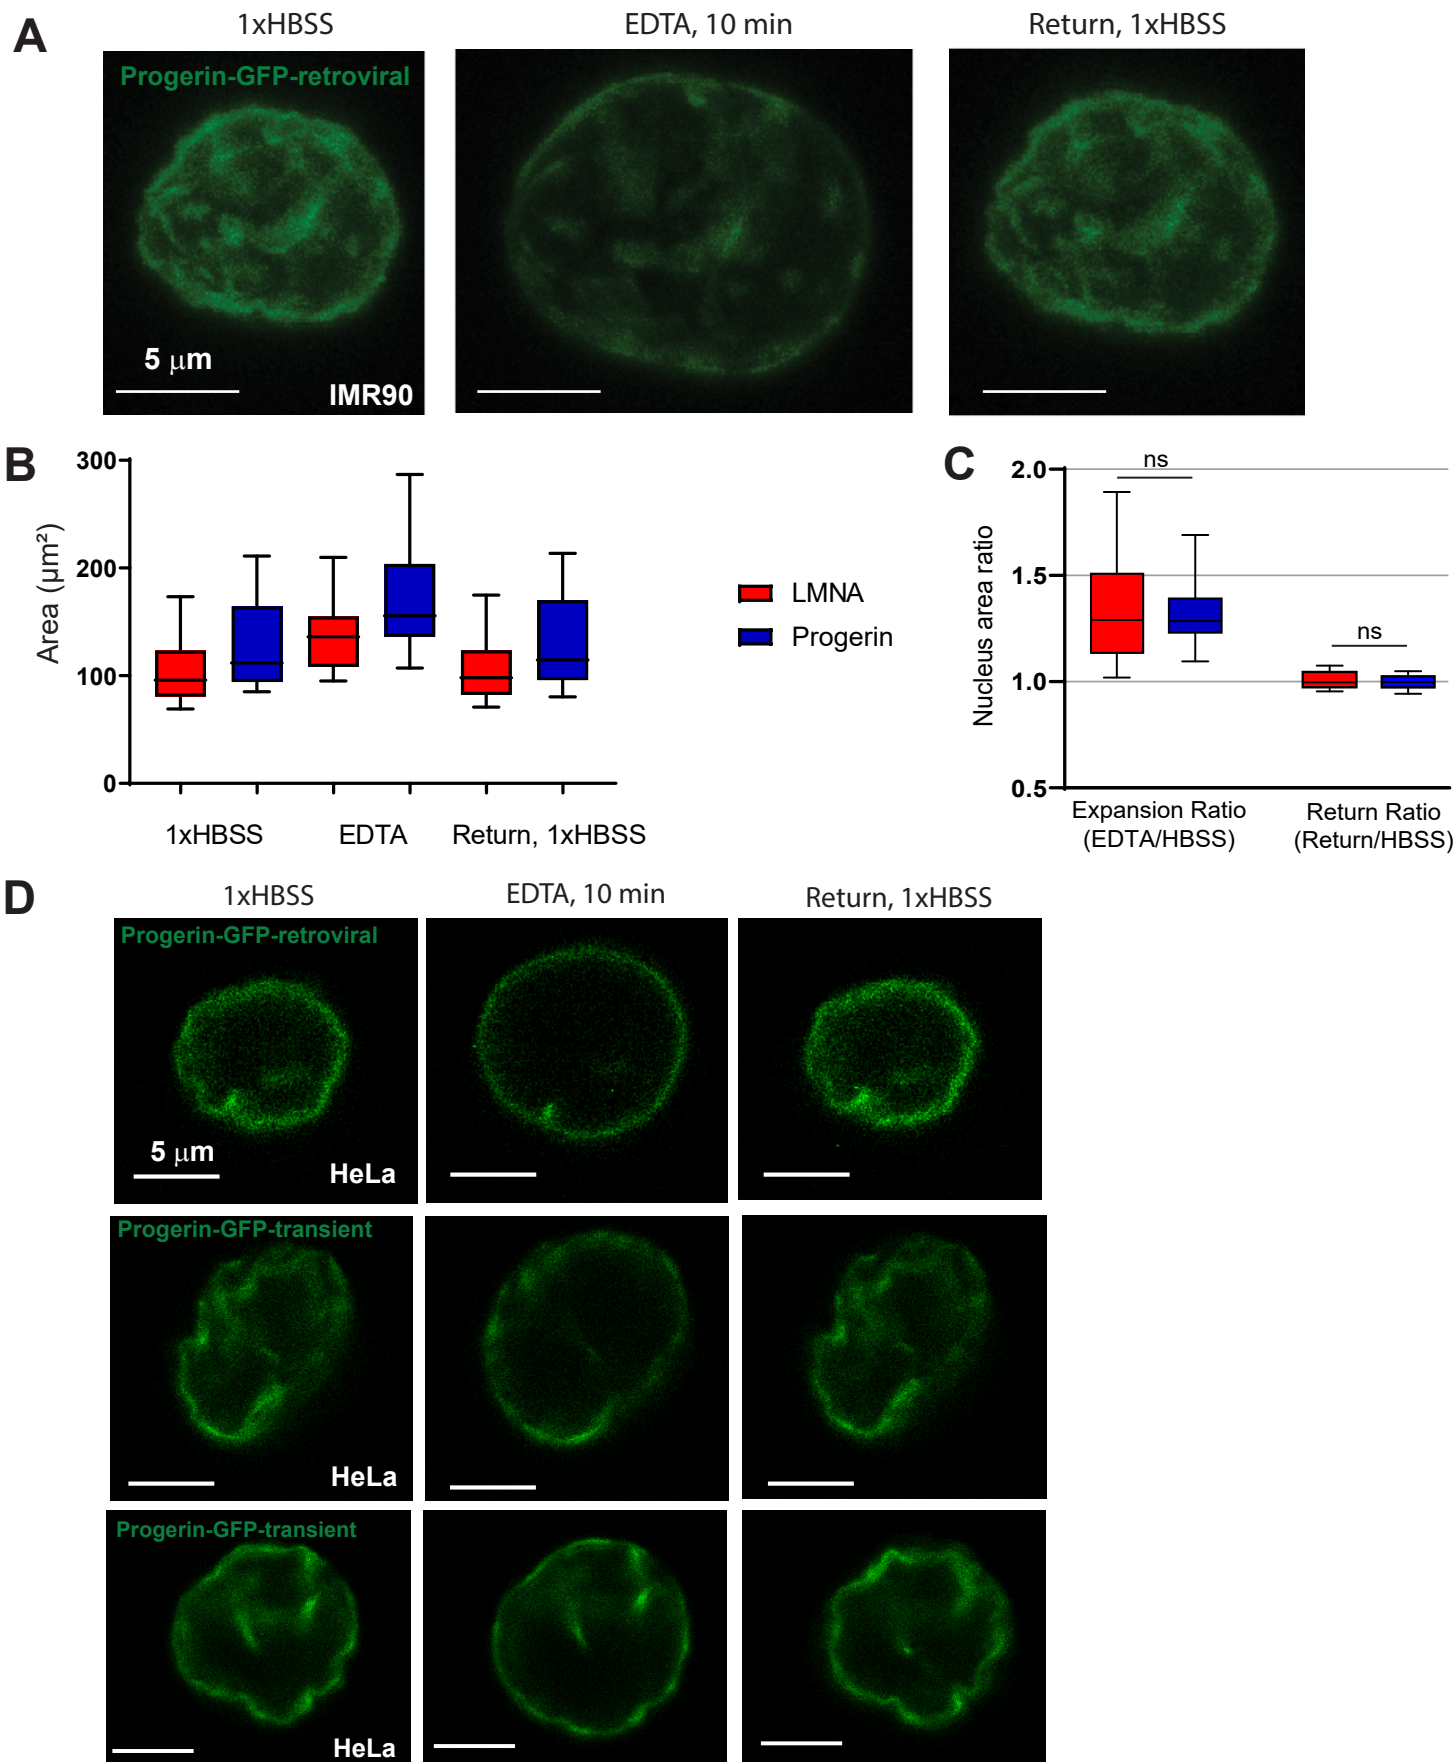

Supplementary Figure 2. A) IMR90 nuclei stably transfected with Progerin-GFP show wrinkles typical of progeria, but are able to expand and re-contract. Maximum projection of confocal Z-stack. B) IMR90 nuclei stably transfected with either WT LMNA-GFP (red, N=12) or Progerin-GFP (blue, N = 19) were quantified during expansion. Boxplots indicate 25th, median, and 75th percentiles. C) Comparing the expansion area ratio (EDTA/original 1xHBSS) and return area ratio (return / original 1xHBSS) shows no significant difference in relative expansion and re-contraction between LMNA and progerin transfected cells (ns:  $p > 0.45$ , t-test). D) HeLa nuclei either transiently or stably transfected with progerin-GFP show smoothing of wrinkles with EDTA expansion and a return to original size in return to 1xHBSS. Confocal image central slice. All scalebars 5 microns.

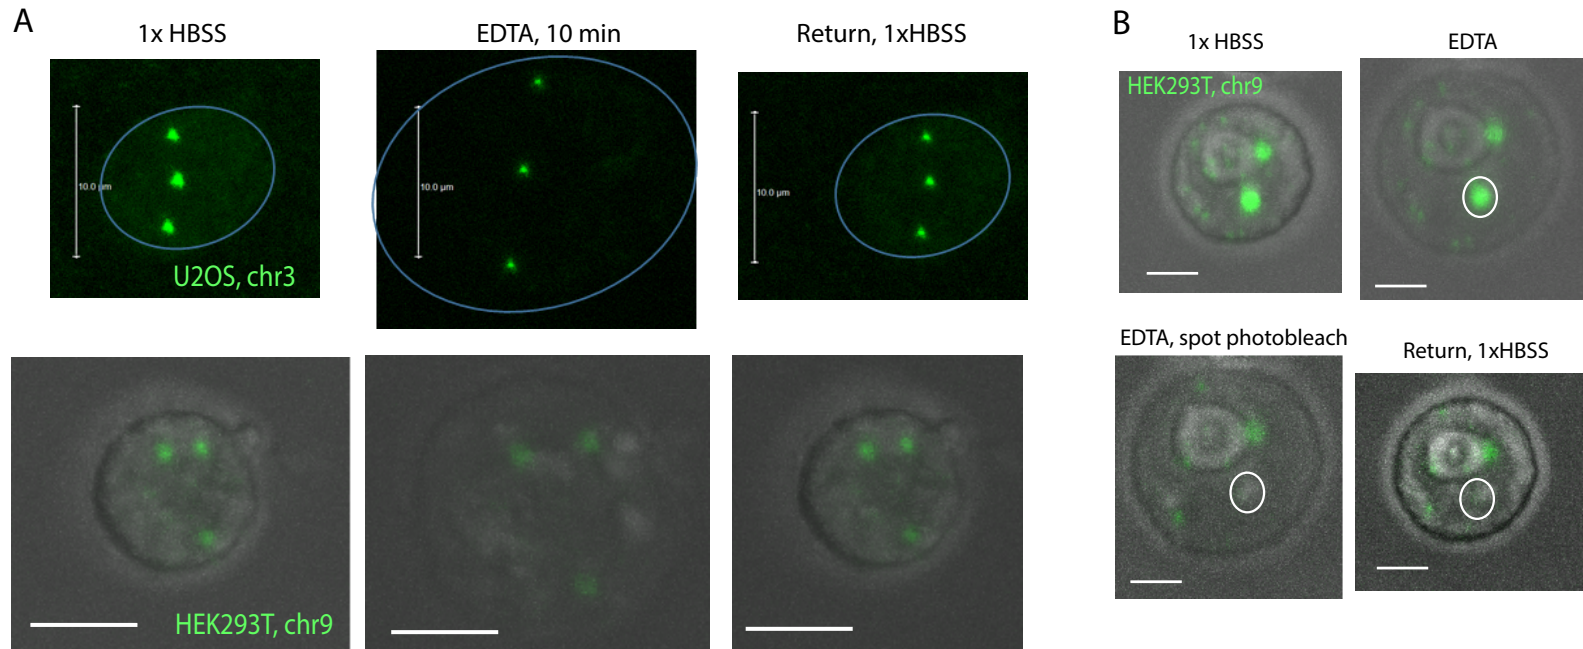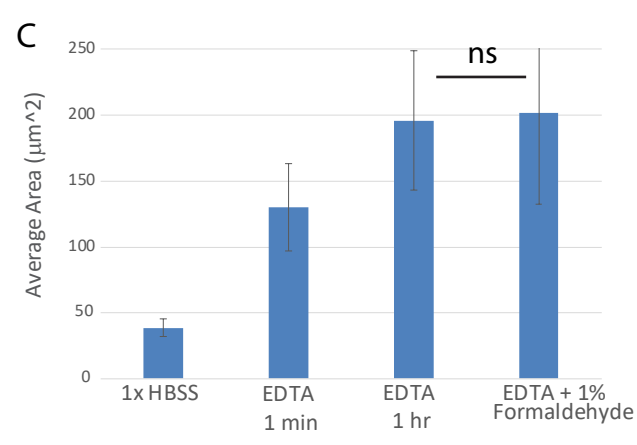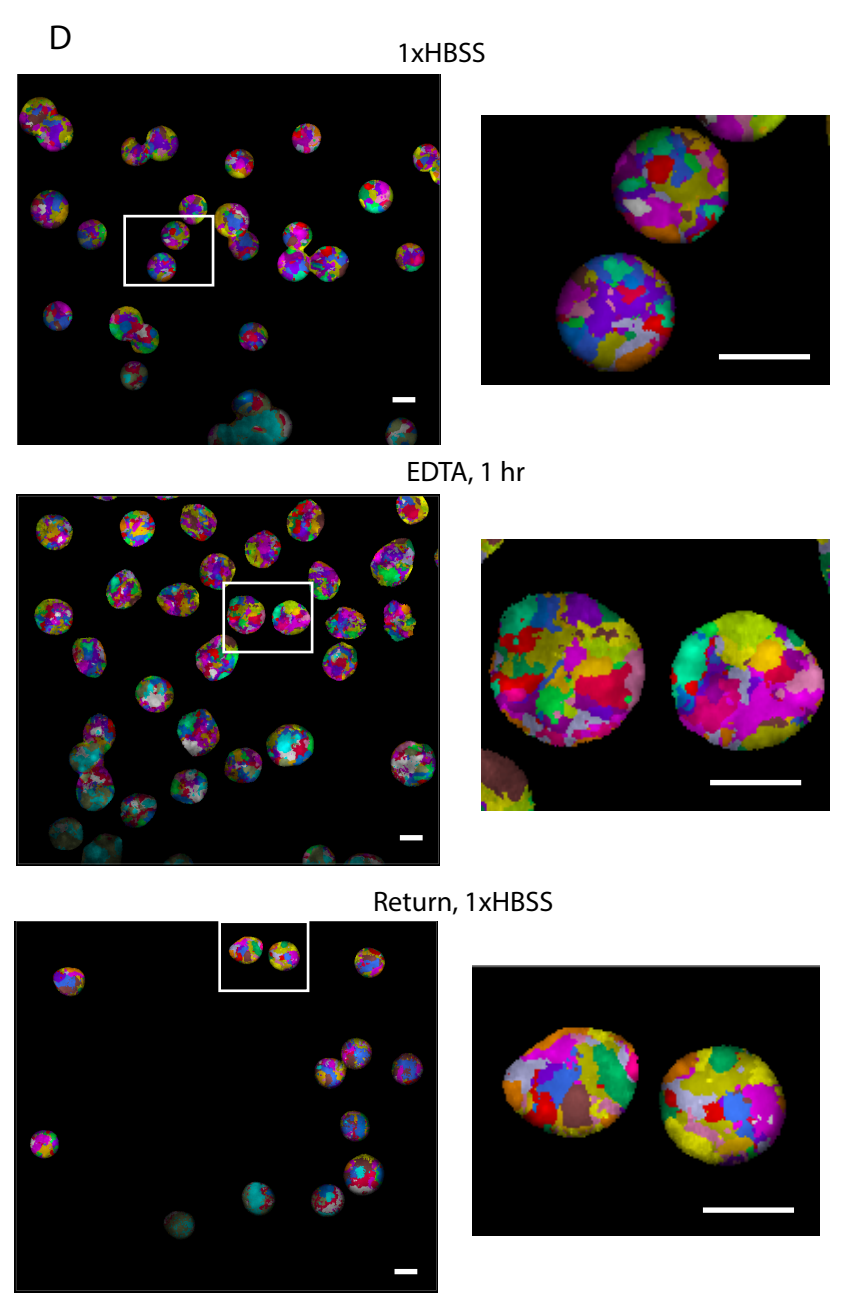

Supplementary Figure 3. A) U2OS cells transfected with Cas9-GFP targeting chromosome 3 pericentromeric region (top) and HEK293T cells transfected with Cas9-GFP targeting chromosome 9 pericentromeric region (bottom). Scale: top = 10 microns, bottom = 5 microns B) No fluorescence recovery is observed after return to 1xHBSS when a Cas9-GFP spot is photobleached (white circle) in the expanded state. (scalebar = 3 microns) C) Expanded nucleus size is preserved after crosslinking with 1% formaldehyde. (Bars show mean, error bars = std. dev. N = 83, 71, 116, 28). NS:  $p = 0.67$  by t-test. D) Multicolor FISH probes indicate the persistence of chromosome territories after expansion and contraction. Right panels = 4x zoom into the region in the white square in each left panel. Scalebars indicate the same distance (5 microns) in all panels.



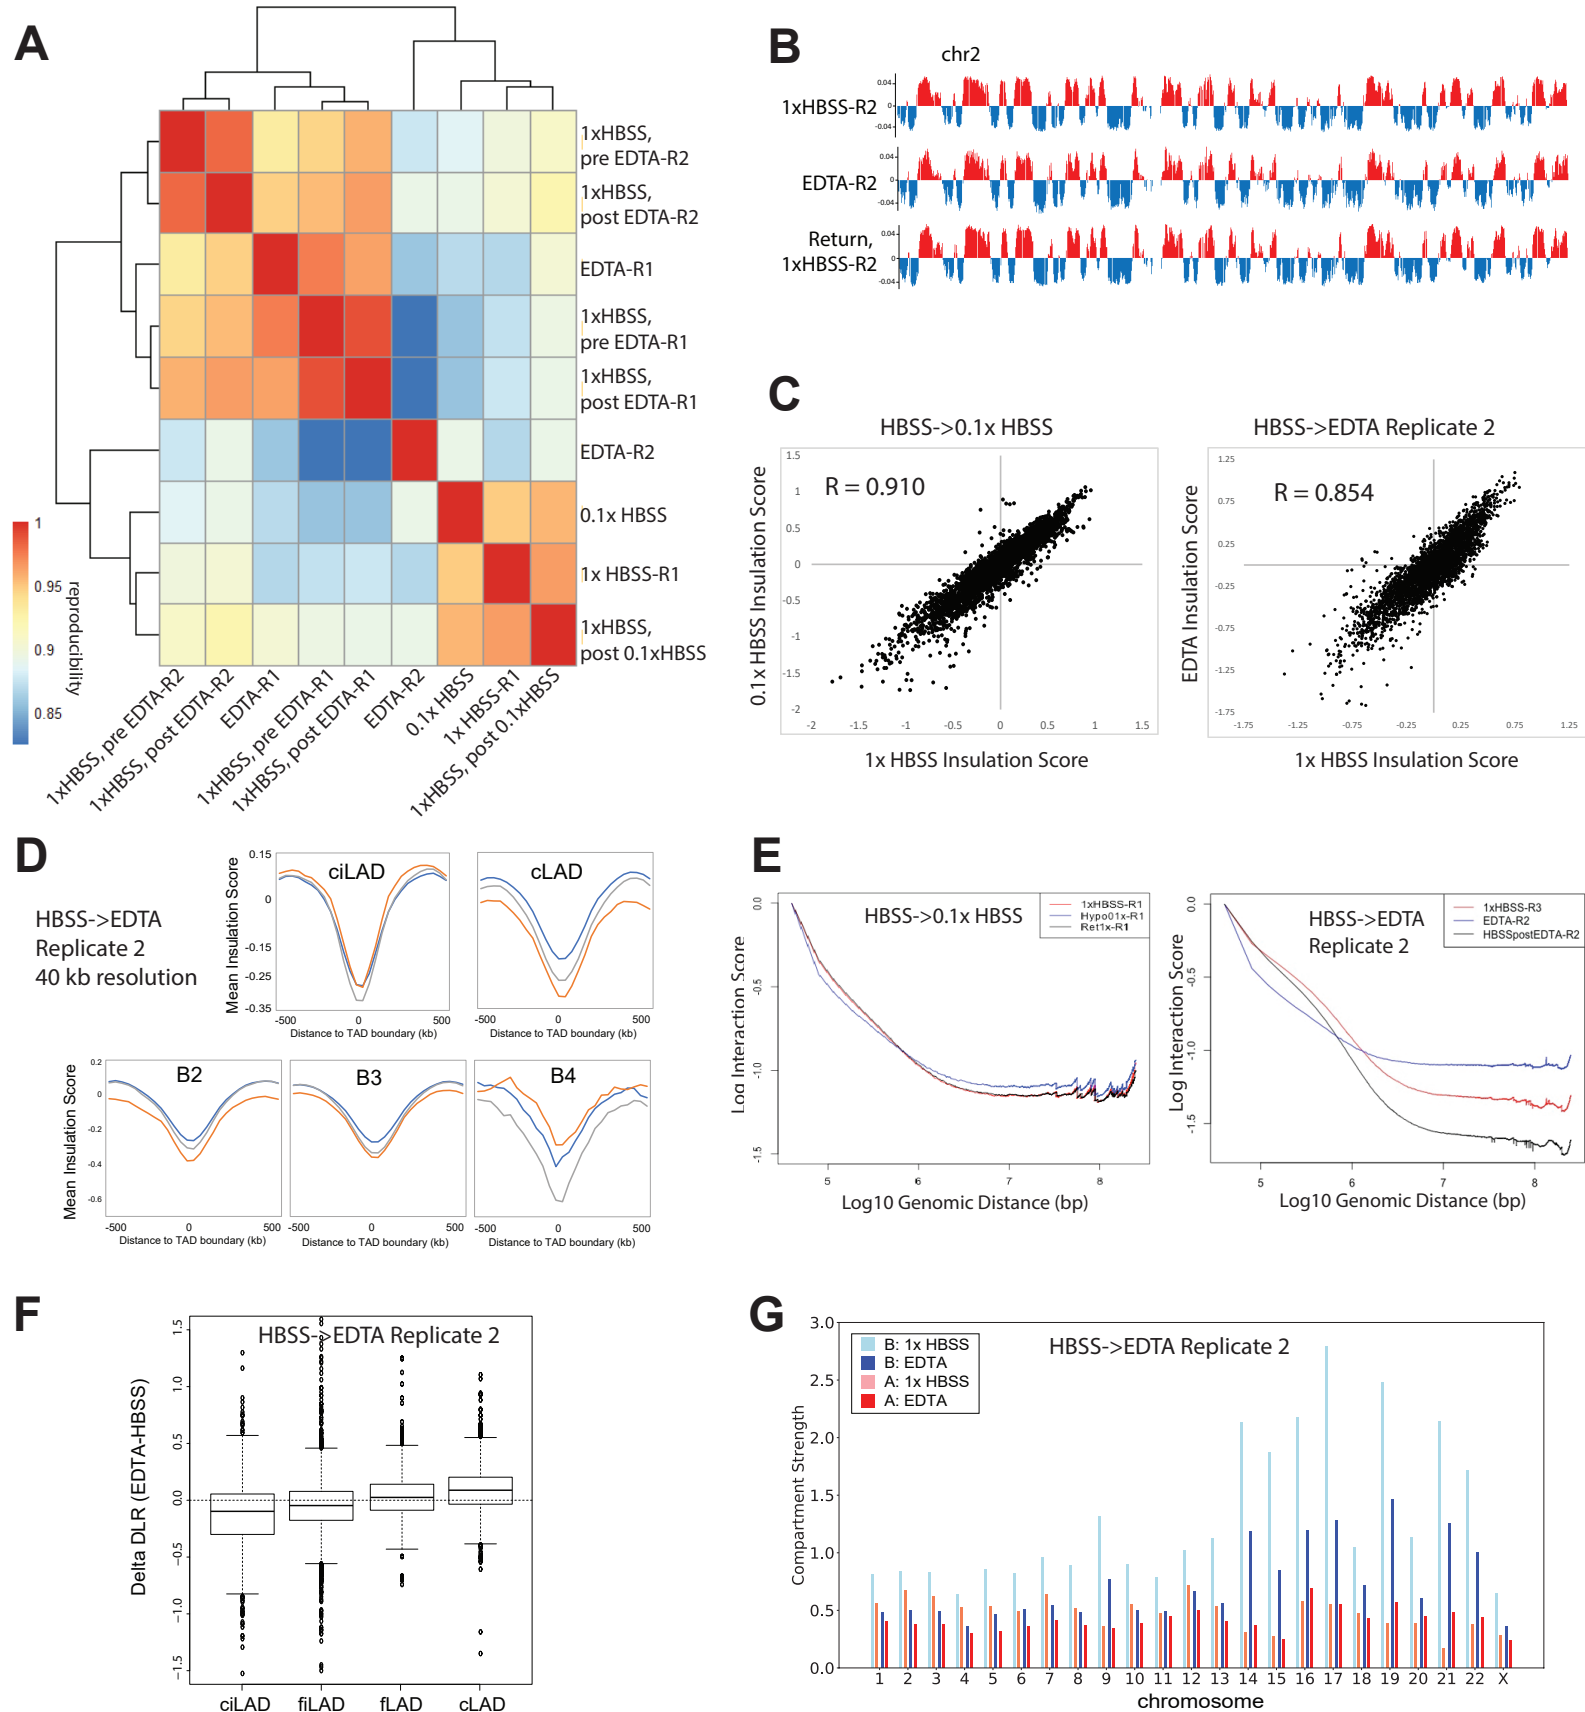

Supplementary Figure 4. A) Genome wide Hi-C contact correlation at 1 Mb resolution between all datasets. Spearman correlation-based reproducibility is calculated as described in the Methods. Replicates have some systematic differences, but expanded conditions (EDTA and 0.1xHBSS) are the more separate from non expanded conditions in each replicate set. B) Compartment identity is conserved during EDTA expansion in replicate 2. chr2 eigenvector 1 is shown at 250 kb resolution. C) TAD insulation scores are preserved in expanded nuclei in both 0.1xHBSS and EDTA treatment replicate. Insulation scores shown for chr2 calculated with 520 kb insulation square size. D) Insulation score shifts around TAD boundaries in selected subcompartments and LAD types genome wide for EDTA replicate 2. 40kb resolution, 520 kb insulation square. 1xHBSS = blue, EDTA = orange, Return = grey. E) Log10 interactions vs. Log10 of genomic distance in base pairs for all 40 kb binned intrachromosomal interactions genome wide in the 0.1xHBSS expansion condition and the second EDTA replicate. A faster drop in local interactions and more long range interactions is observed in expansion. F) Changes in Distal Local Ratio for the whole genome separated into LAD status as classified by Kind et al. As in Figure 5D, but using Hi-C data from EDTA replicate 2. G) Compartment strength compared between 1x HBSS and EDTA for replicate 2.

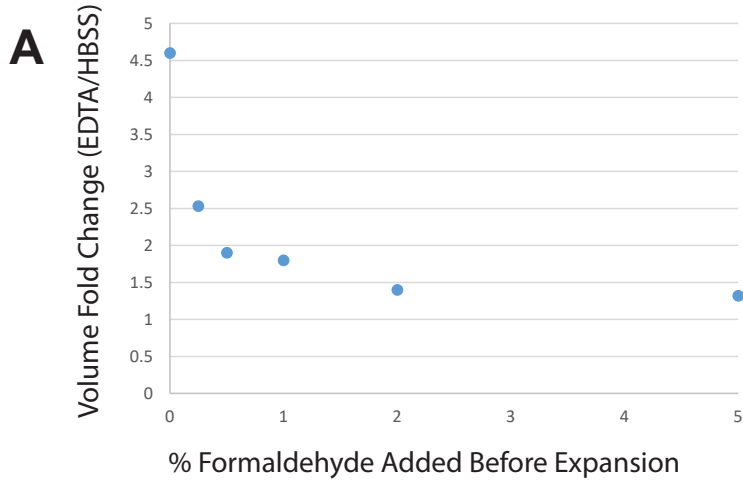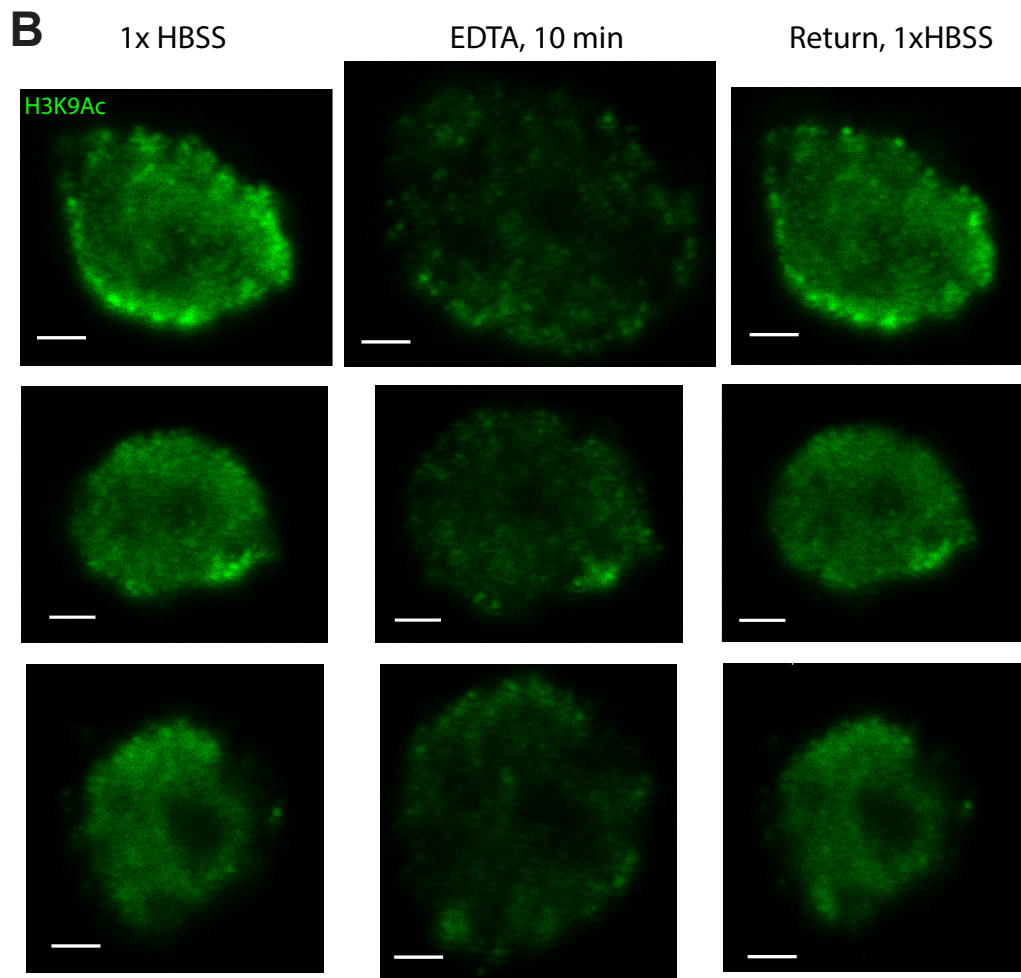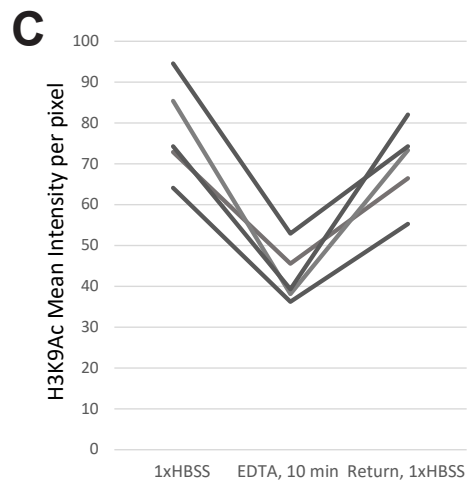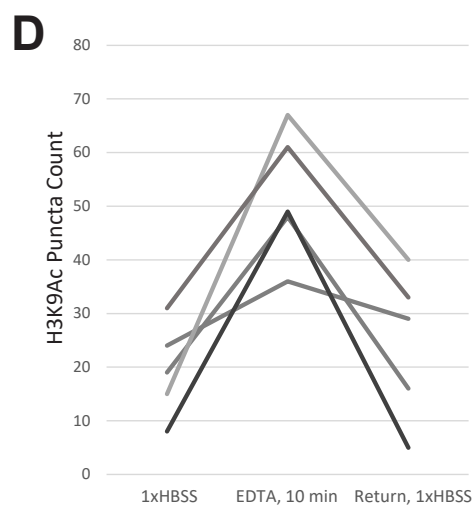

Supplementary Figure 5 A) Nuclei were crosslinked with increasing percentages of formaldehyde for 10 min prior to expansion with EDTA and the average fold change in nucleus volume after EDTA for 10 minutes is indicated. B) H3K9Ac immunostained (green) isolated GM12878 nuclei show more evident individual foci of this histone modification localization in the EDTA expanded state. After return to 1xHBSS, the original pattern is largely recapitulated. Images show a single confocal Z slice. Scale bars = 2  $\mu$ m. C) The mean H3K9Ac intensity across each whole nucleus decreases during expansion. Lines connect the same nucleus. D) The number of detectable H3K27Ac puncta increases in the expanded state, as measured by thresholding the top 10% intensity and then detecting particles in ImageJ. Lines connect the same nucleus.

**Supplementary Table 1. Hi-C Mapping Statistics**

| Condition                 | Replicate | Raw # Reads | # Both Sides Mapped | Valid Pairs | Unique Valid Pairs | % Cis | % Dangling Ends |
|---------------------------|-----------|-------------|---------------------|-------------|--------------------|-------|-----------------|
| 1x HBSS                   | R1        | 228,519,373 | 158,543,659         | 133,626,690 | 127,083,536        | 38.0  | 10.6            |
| 0.1x HBSS, 1 h            | R1        | 226,837,794 | 162,358,348         | 117,359,572 | 88,661,306         | 44.3  | 22.4            |
| Return, 1xHBSS            | R1        | 235,448,026 | 162,146,341         | 137,471,985 | 132,619,644        | 42.4  | 10.0            |
| 1x HBSS                   | R2        | 863,126,588 | 610,087,746         | 500,187,621 | 464,002,407        | 82.5  | 17.2            |
| HEPES + 1mM EDTA, 1 h     | R1        | 715,788,323 | 505,049,377         | 370,779,196 | 333,864,494        | 74.8  | 25.9            |
| Return, 1xHBSS after EDTA | R1        | 706,960,951 | 484,478,770         | 389,402,191 | 350,509,296        | 76.4  | 19.1            |
| 1x HBSS                   | R3        | 128,374,188 | 100,671,274         | 66,707,754  | 63,677,166         | 68.8  | 33.4            |
| HEPES + 1mM EDTA, 1 h     | R2        | 116,329,893 | 85,695,816          | 47,499,071  | 43,718,226         | 42.1  | 42.7            |
| Return, 1xHBSS after EDTA | R2        | 162,888,591 | 123,015,944         | 95,068,131  | 90,774,223         | 68.7  | 21.9            |

**Supplementary Table 2. Factors enriched at GM12878 Loop Anchors All Rao Loops**

| Factor              | # Loops with Factor | # Random with Factor | Total # Loops | % Loops with Factor | Log2(Real/Random) |
|---------------------|---------------------|----------------------|---------------|---------------------|-------------------|
| Sydh_Gm12878_Znf143 | 3633                | 465.53               | 7162          | 50.73               | 2.96              |
| Sydh_Gm12878_Rad21  | 5239                | 737.13               | 7162          | 73.15               | 2.83              |
| Sydh_Gm12878_Smc3   | 5263                | 813.33               | 7162          | 73.49               | 2.69              |
| Uw_Gm12878_Ctcf     | 5324                | 857.25               | 7162          | 74.34               | 2.63              |
| Haib_Gm12878_Rad21  | 5301                | 889.1                | 7162          | 74.02               | 2.58              |
| Sydh_Gm12878_Ctcf   | 5428                | 1111.59              | 7162          | 75.79               | 2.29              |
| Broad_Gm12878_Ctcf  | 5399                | 1129.56              | 7162          | 75.38               | 2.26              |
| Uta_Gm12878_Ctcf    | 5370                | 1192.24              | 7162          | 74.98               | 2.17              |
| Haib_Gm12878_Yy1    | 3240                | 746.7                | 7162          | 45.24               | 2.12              |

**Rao Loops annotated as non-CTCF**

| Factor              | # Loops with Factor | # Random with Factor | Total # Loops | % Loops with Factor | Log2(Real/Random) | Log2(Enrichment in non-CTCF/CTCF) |
|---------------------|---------------------|----------------------|---------------|---------------------|-------------------|-----------------------------------|
| Sydh_Gm12878_Corest | 108                 | 21.77                | 2882          | 3.75                | 2.31              | 1.08                              |
| Haib_Gm12878_Rxra   | 131                 | 28.24                | 2882          | 4.55                | 2.21              | 0.23                              |
| Haib_Gm12878_Bclaf  | 420                 | 91.87                | 2882          | 14.57               | 2.19              | 0.51                              |
| Sydh_Gm12878_Stat3  | 441                 | 99.42                | 2882          | 15.30               | 2.15              | 0.97                              |
| Sydh_Gm12878_Znf143 | 1021                | 232.27               | 2882          | 35.43               | 2.14              | -0.83                             |
| Sydh_Gm12878_P300b  | 391                 | 92.15                | 2882          | 13.57               | 2.09              | 1.68                              |
| Sydh_Gm12878_Smc3   | 1418                | 338.12               | 2882          | 49.20               | 2.07              | -0.63                             |
| Haib_Gm12878_Stat5a | 465                 | 114.86               | 2882          | 16.13               | 2.02              | 1.19                              |
| Sydh_Gm12878_Rad21  | 1410                | 353.38               | 2882          | 48.92               | 2.00              | -0.83                             |

|                    |      |        |      |       |      |
|--------------------|------|--------|------|-------|------|
| Uta_Gm12878_Ctcf   | 1474 | 453.21 | 2882 | 51.15 | 1.70 |
| Broad_Gm12878_Ctcf | 1448 | 457.57 | 2882 | 50.24 | 1.66 |
| Uw_Gm12878_Ctcf    | 1347 | 432.45 | 2882 | 46.74 | 1.64 |
| Sydh_Gm12878_Ctcf  | 1544 | 497.09 | 2882 | 53.57 | 1.64 |

**Rao Loops annotated as non-CTCF and with no ENCODE CTCF peaks**

| Factor              | # Loops with Factor | # Random with Factor | Total # Loops | % Loops with Factor | Log2(Real/Random) | Log2(Enrichment in non-CTCF/CTCF) |
|---------------------|---------------------|----------------------|---------------|---------------------|-------------------|-----------------------------------|
| Sydh_Gm12878_P300b  | 58                  | 9.42                 | 372           | 15.59               | 2.62              | 2.22                              |
| Haib_Gm12878_P300   | 47                  | 7.73                 | 372           | 12.63               | 2.60              | 1.92                              |
| Sydh_Gm12878_Cfos   | 14                  | 2.31                 | 372           | 3.76                | 2.60              | 1.88                              |
| Sydh_Gm12878_Jund   | 25                  | 4.29                 | 372           | 6.72                | 2.54              | 2.14                              |
| Haib_Gm12878_Cebp   | 45                  | 8.61                 | 372           | 12.10               | 2.39              | 1.59                              |
| Sydh_Gm12878_Chdi   | 41                  | 7.89                 | 372           | 11.02               | 2.38              | 1.57                              |
| Sydh_Gm12878_Tbp    | 83                  | 16.98                | 372           | 22.31               | 2.29              | 1.55                              |
| Haib_Gm12878_Stat5a | 51                  | 10.92                | 372           | 13.71               | 2.22              | 1.39                              |
| Haib_Gm12878_Mta3   | 72                  | 15.99                | 372           | 19.35               | 2.17              | 1.51                              |
| Haib_Gm12878_Pax5   | 89                  | 20.46                | 372           | 23.92               | 2.12              | 1.35                              |
| Haib_Gm12878_Sp1    | 85                  | 19.84                | 372           | 22.85               | 2.10              | 1.33                              |
| Haib_Gm12878_Taf1   | 65                  | 15.35                | 372           | 17.47               | 2.08              | 1.37                              |
| Sydh_Gm12878_Ikzf1  | 47                  | 11.86                | 372           | 12.63               | 1.99              | 1.57                              |

**Supplementary Table 3. Datasets used in Ridge and Random Forest Regression Models .** All datasets are listed with their accession numbers in Encode or 4D Nucleome databases.

| <b>Dataset</b>          | <b>Accession Number (FileType)</b> |
|-------------------------|------------------------------------|
| Repli-seq G1b           | ENCFF001GNK (bigWig)               |
| Repli-seq G2            | ENCFF001GNN (bigWig)               |
| Repli-seq S1            | ENCFF001GNR (bigWig)               |
| Repli-seq S2            | ENCFF001GNT (bigWig)               |
| Repli-seq S3            | ENCFF001GNX (bigWig)               |
| Repli-seq S4            | ENCFF001GOA (bigWig)               |
| MNase-seq               | ENCFF000VME (bigWig)               |
| FAIRE-seq               | ENCFF000THZ (bigWig)               |
| TSA-seq SON (K562)      | 4DNFIJC5NB7V (fastq)               |
| TSA-seq Lamin AC (K562) | 4DNFI7A2TXMD (fastq)               |
| TSA-seq Lamin B (K562)  | 4DNFI9CPTQRL (fastq)               |
| H2AFZ                   | ENCFF885XEM (bigWig)               |
| H3K27Ac                 | ENCFF180LKW (bigWig)               |
| H3K27Me3                | ENCFF167NBF (bigWig)               |
| H3K36Me3                | ENCFF335VEM (bigWig)               |
| H3K4Me1                 | ENCFF682WPF (bigWig)               |
| H3K4Me2                 | ENCFF828CQV (bigWig)               |
| H3K4Me3                 | ENCFF818GNV (bigWig)               |
| H3K79Me2                | ENCFF396JIR (bigWig)               |
| H3K9Ac                  | ENCFF465KNK (bigWig)               |
| H3K9Me3                 | ENCFF776OVW (bigWig)               |
| H4K20Me1                | ENCFF831WYD (bigWig)               |

**Supplementary Movie 1.** This movie shows an H3K9Ac stained isolated GM12878 nucleus as in Supplementary Figure 5B. Frames are taken every 10 seconds. At the beginning of the timelapse, the nucleus is in 1x HBSS. Then, two washes of EDTA in 1 mM HEPES are added and the nucleus expands rapidly.
